# Supplementary material for: Metabolic Maturation Exaggerates Abnormal Calcium Handling in a Lamp2 Knockout Human Pluripotent Stem Cell-Derived Cardiomyocyte Model of Danon Disease
Source: MDPI journal article supplement (doi:10.3390/biom13010069), 2022-12-29

**A**

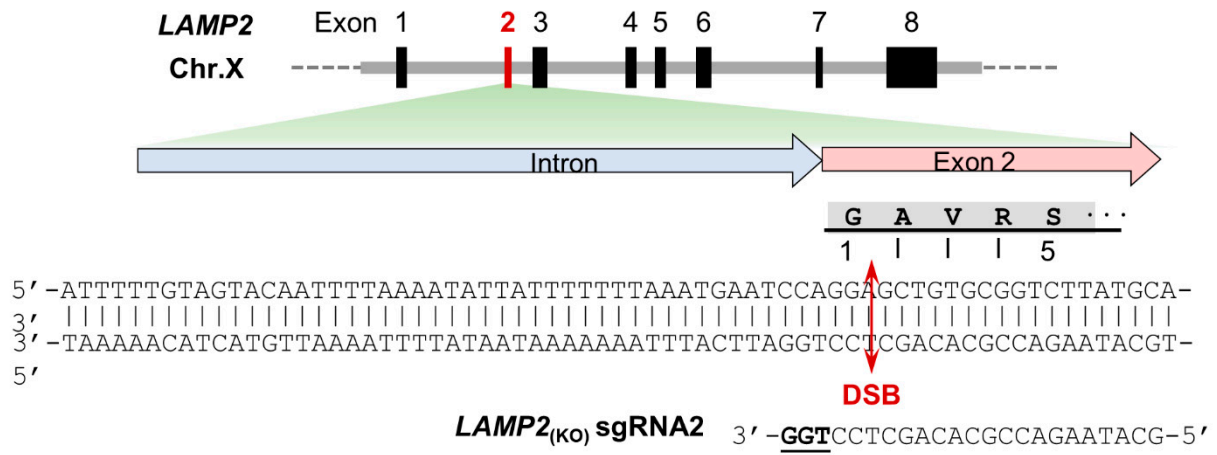

**LAMP2-KO line 2 (46bp deletion)**

5' -ATTTTGT-----GCGGTCTTATGCA-  
 3'

**B**

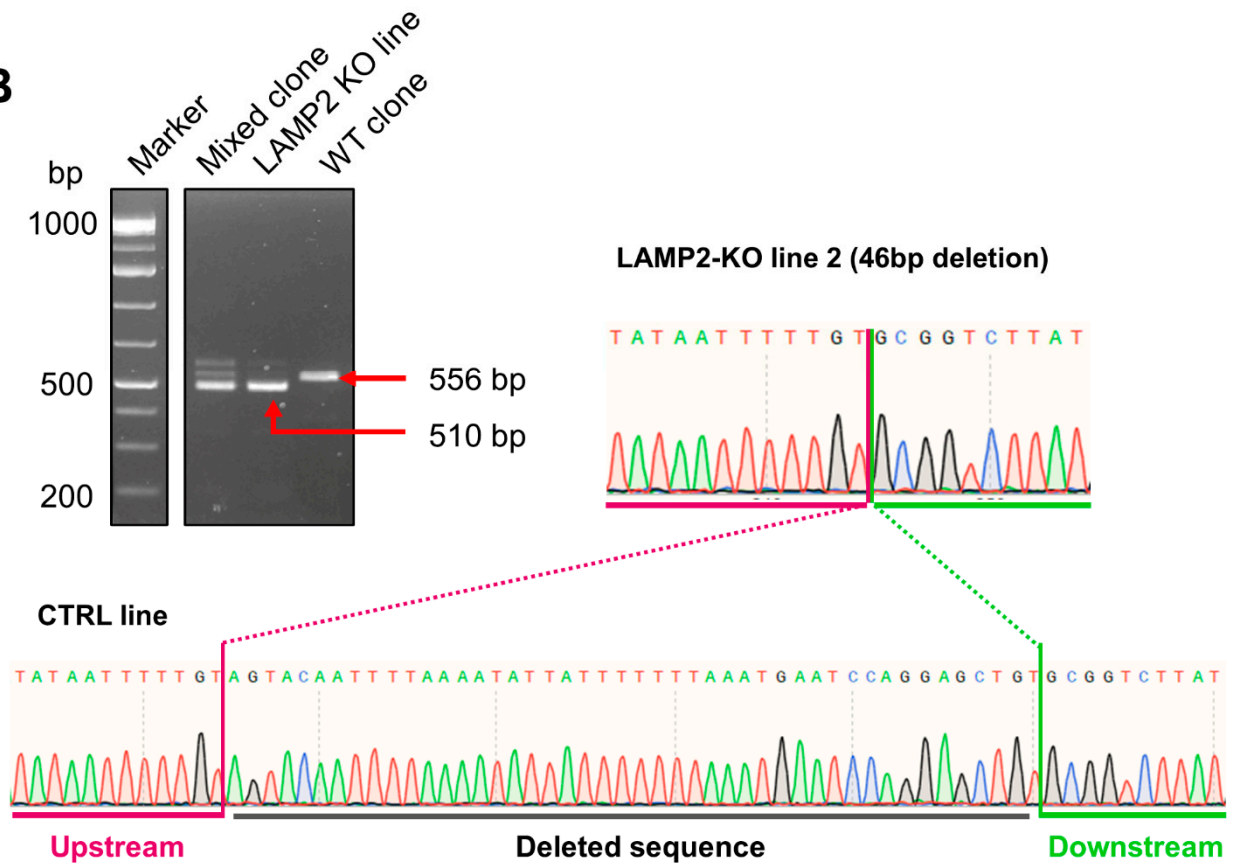

**Figure S1. CRISPR KO design and results for the second *LAMP2* KO iPSC line.** A. Design of CRISPR KO sgRNA targeting the 2<sup>nd</sup> exon of *LAMP2*. B: sequencing result confirmed a 46 bp deletion around the splicing site of the *LAMP2* exon 2, which result in the truncation of *LAMP2*.

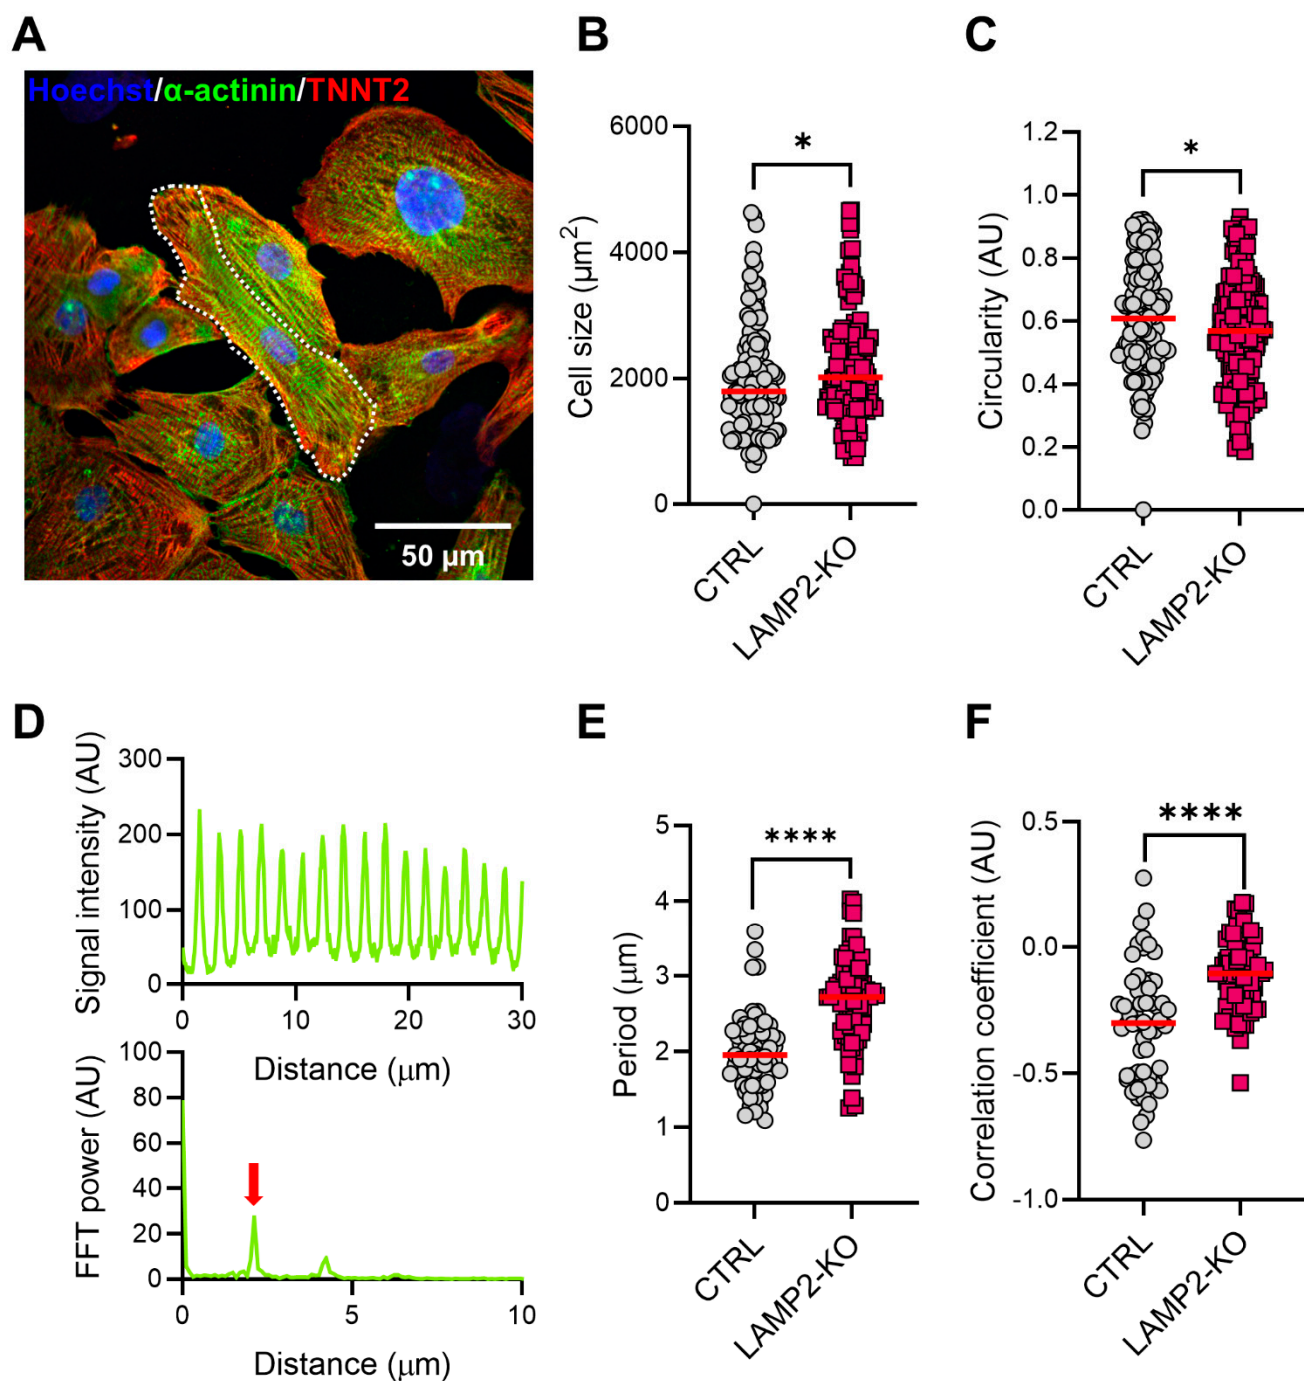

**Figure S2. Morphological measurement of Ctrl and *LAMP2* KO iPSC-CMs.** A. Representative immuno-fluorescence imaging of *LAMP2* KO iPSC-CMs. Blue: Hoechst; Green:  $\alpha$ -actinin; Red: TNNT2. B and C. The *LAMP2* KO iPSC-CMs exhibit enlarged cell size (B) and elongated shape (C) compared to Ctrl cells. N = 136 and 162 cells for Ctrl and *LAMP2* KO group from at least 3 independent experiments. D. Representative traces show the distributions of  $\alpha$ -actinin protein signal in immunofluorescence and the frequency distribution of signals after Fast Fourier transformation (FFT). Arrow indicates the peak of signal regularity, which represents the average sarcomere length. E and F. The period of sarcomere signal distribution and the correlation coefficient of  $\alpha$ -actinin and TNNT2 signals in Ctrl and *LAMP2* KO iPSC-CMs. N = 59 for Ctrl, N = 73 for *LAMP2* KO. Data from at least 3 independent experiments. \* $p < 0.05$  and \*\*\*\* $p < 0.0001$  versus Ctrl iPSC-CMs by unpaired t-test.

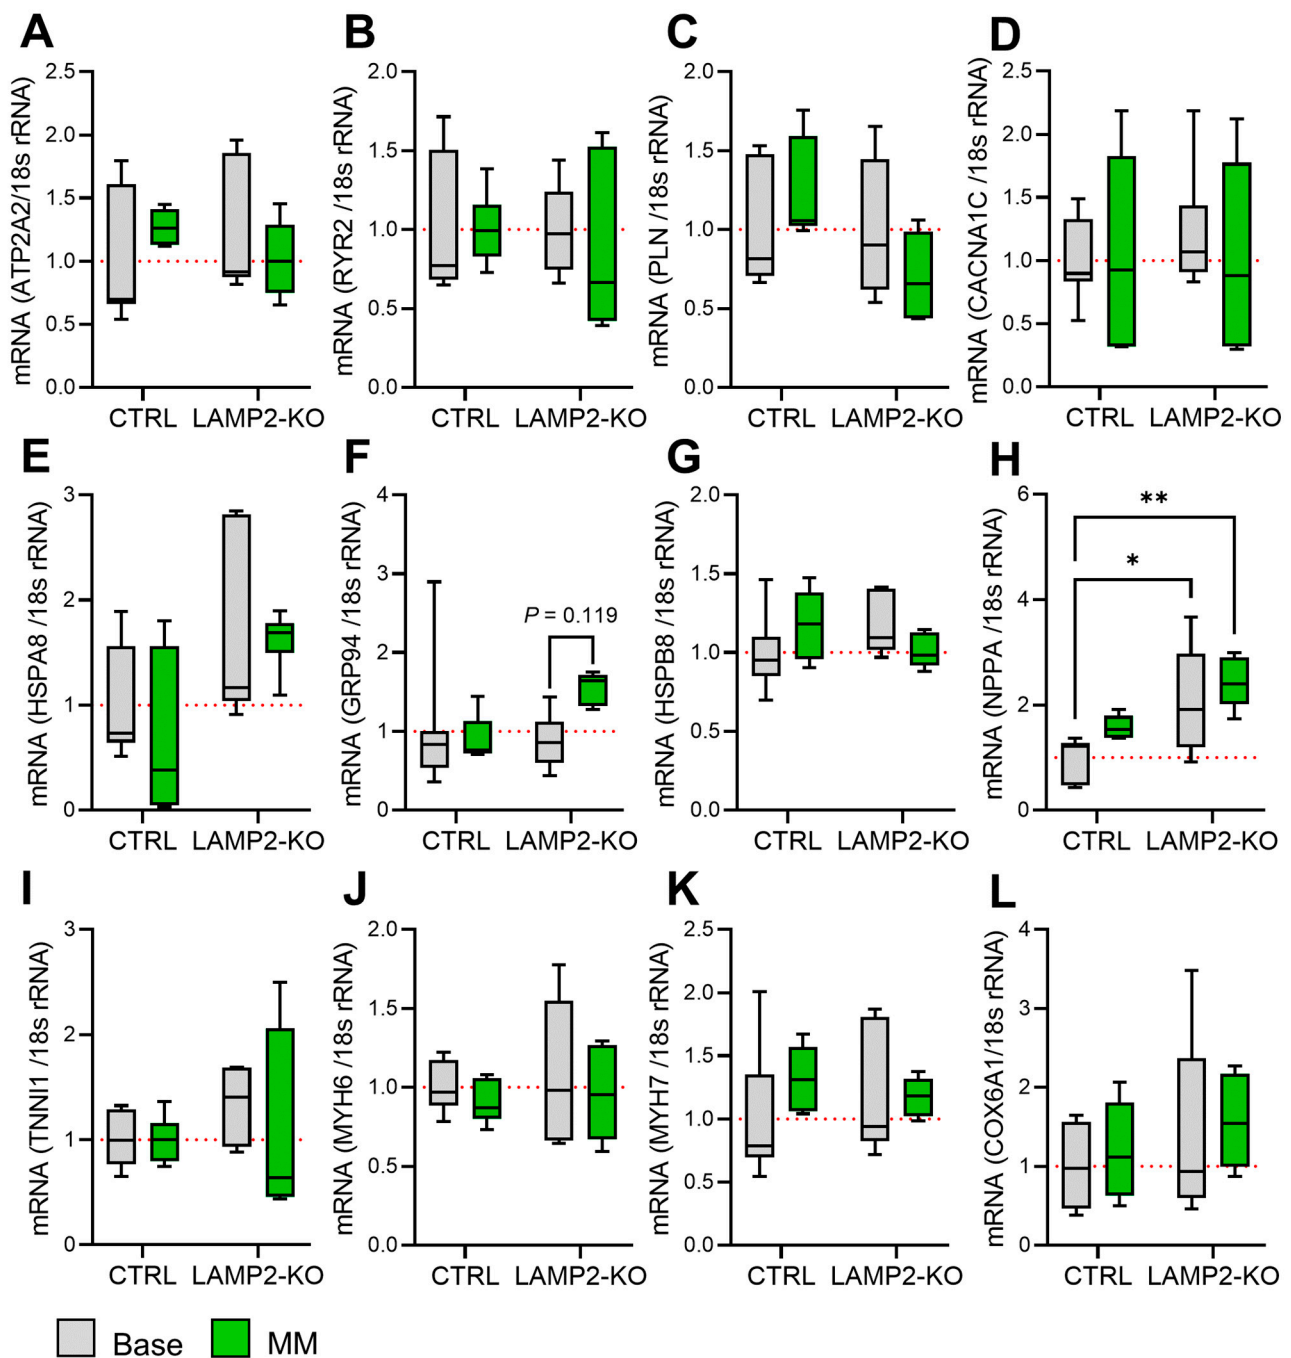

**Figure S3. Real-time PCR quantification of mRNA expression of additional key cardiac genes in Ctrl and *LAMP2* KO iPSC-CMs.** A–D. There is no significant change of calcium handling gene expression, such as ATP2A2 (SERCA2, A), RYR2 (ryanodine receptor 2, B), PLN (phospholamban, C), and CACNA1C (L-type calcium channel, D) in Ctrl and *LAMP2* KO groups. E to G. Expression of heat shock proteins HSP70 (HSPA8, E) and chaperone protein GRP94 (F) showed trends of upregulation in *LAMP2* KO iPSC-CMs, while no change was observed for heat shock protein HSP22 (HSPB8, G). H. *LAMP2* KO iPSC-CMs showed much higher expression of cardiac stress marker NPPA in both base and MM treated groups. I to K. MM treatment didn't affect the expression of immature subtype of sarcomere proteins TNNT1 (I) and MYH6 (J), yet the expression of mature subtype sarcomere protein MYH7 (K) showed a trend of upregulation in both groups after MM treatment. L. Mitochondrial protein Cytochrome c oxidase 6A1 (COX6A1) showed a trend of upregulation in MM treated *LAMP2* KO cells. For all the qPCR experiments here, data from at least 3 independent experiments. \* $p < 0.05$  and \*\* $p < 0.01$  versus Ctrl iPSC-CMs by two-way ANOVA test followed by Holm–Sidak method.

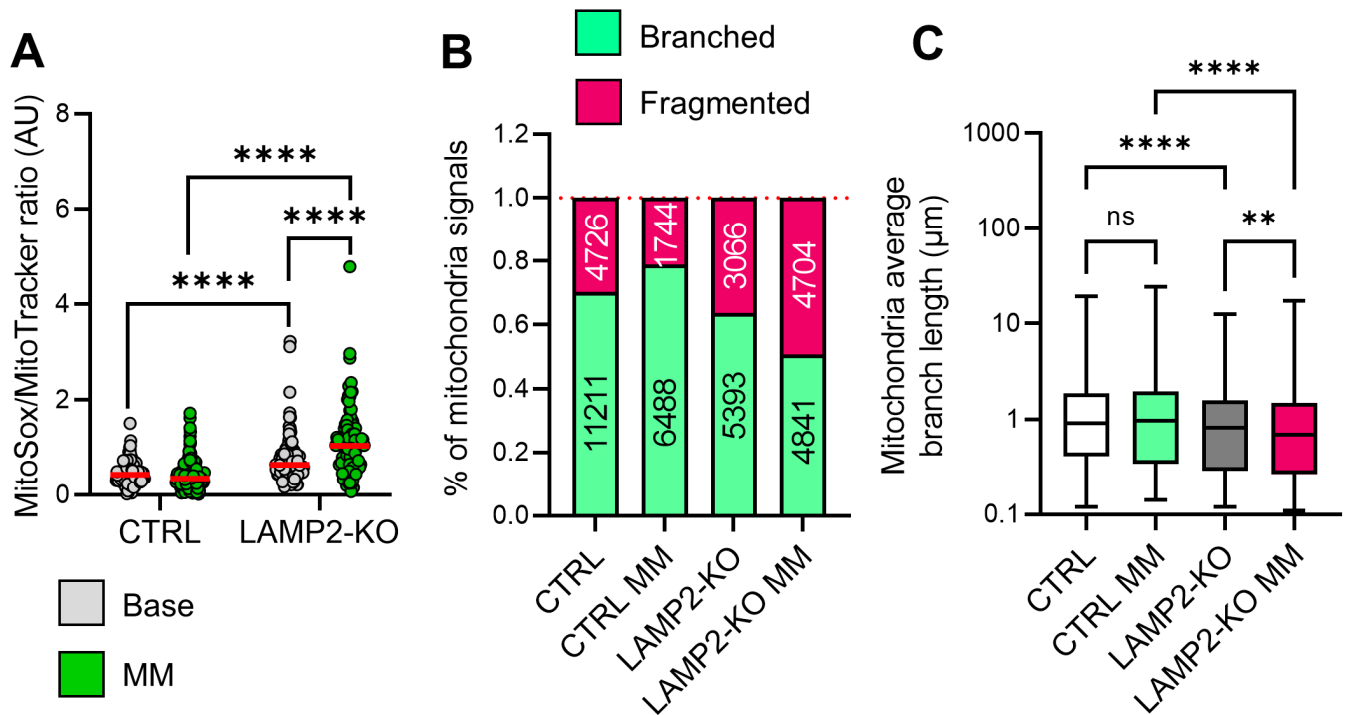

**Figure S4. MM treatment induces morphological and function remodeling of mitochondria in *LAMP2* KO iPSC-CMs.** A. Mitochondrial ROS levels (mROS) measured as MitoSOX/MitoTracker ratio was unchanged in Ctrl cells upon MM treatment but was greatly increased in *LAMP2* KO cells. N = 151, 223, 150, 112 cells in Ctrl + MM, *LAMP2* KO + MM, *LAMP2* KO + MM + NAC, and *LAMP2* KO + MM + Rapa group from at least 3 independent experiments. \*\*\* $p < 0.001$  and \*\*\*\* $p < 0.0001$  versus Ctrl iPSC-CMs by 2-way ANOVA test followed by Holm-Sidak method. B. MM treatment caused an increased percentage of fragmented mitochondria in *LAMP2* KO iPSC-CMs but not in Ctrl iPSC-CMs. C. The average length of mitochondrial branches was decreased in *LAMP2* KO iPSC-CMs compared to Ctrl group, both before and after MM treatment. N = 11211, 6488, 5393, 4841 branch counts in Ctrl + MM, *LAMP2* KO + MM, *LAMP2* KO + MM + NAC, and *LAMP2* KO + MM + Rapa group from at least 3 independent experiments. \*\* $p < 0.01$  and \*\*\*\* $p < 0.0001$  by one-way ANOVA test followed by Tukey's test.

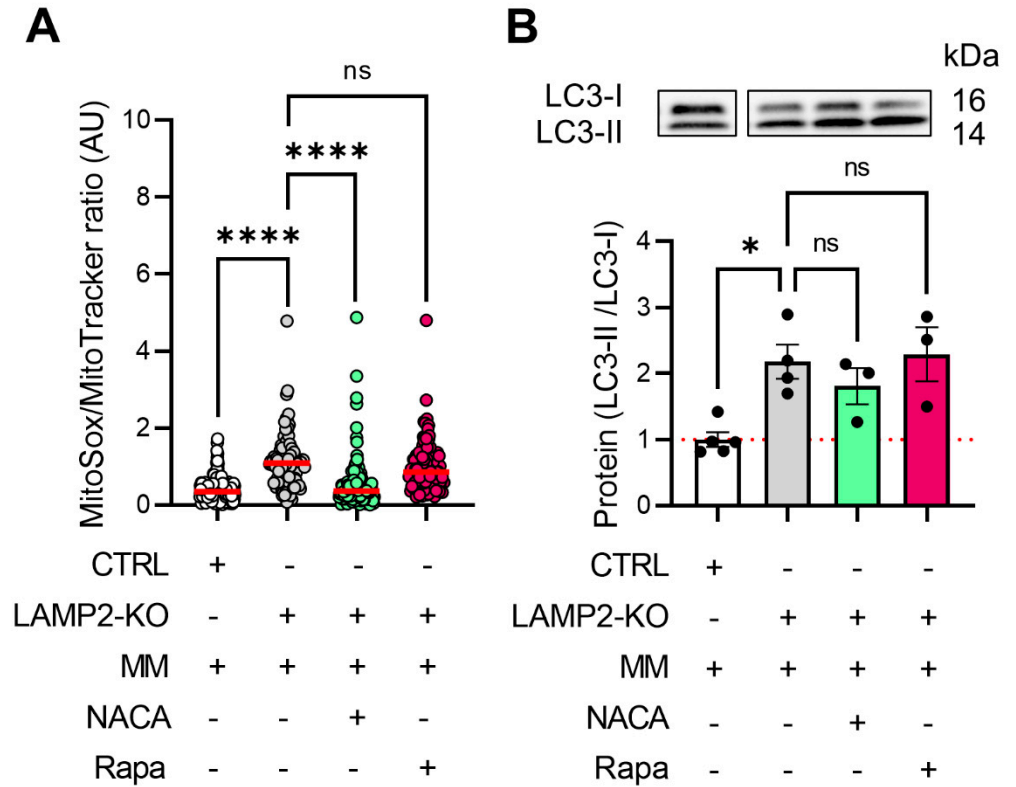

Supplement: s1 [file s1]
