# Supplementary material for: Metabolic Maturation Exaggerates Abnormal Calcium Handling in a Lamp2 Knockout Human Pluripotent Stem Cell-Derived Cardiomyocyte Model of Danon Disease
Source: MDPI journal article supplement (doi:10.3390/biom13010069), 2022-12-29
Supplement: s1 [file s1]

**Supplemental Table S3. Summary of the sequences of sgRNA off-target primers used in the current study.**

| Genomic position                                                    | Primer sequences     |                       | Product size (bp) |
|---------------------------------------------------------------------|----------------------|-----------------------|-------------------|
|                                                                     | Forward              | Reverse               |                   |
| sgRNA 1 target: CATTATATGTCACAGTGCCA TGG                            |                      |                       |                   |
| Off-target site 1: chr2: -58244737*: CATTCTATGACACAGTGCCA CAG       |                      |                       |                   |
| Primer set 1                                                        | CTCCCAGTTCCCACCAGTAA | TTTGCCTGATCAAATCCAAA  | 360               |
| Primer set 2                                                        | CTCCCAGTTCCCACCAGTAA | AAACAGGCAAGAGCAAAGTGA | 402               |
| Off-target site 2: chr21: +17964866: TAATATGTGTACAGTGCCA CAG        |                      |                       |                   |
| Primer set 1                                                        | ATTTGGCAGAGGCTTCAGTG | AAACAGGACATGGGGAAACC  | 462               |
| Primer set 2                                                        | TCCTGGTTTCCTGAGTGTC  | TGGTTTCCAGATGTTCTTGG  | 304               |
| Off-target site 3: chr1: +244973646: CGTTTTATTTACAGTGCCA CGG        |                      |                       |                   |
| Primer set 1                                                        | TTGTGCAGAGTGCTTGAAC  | TGAGCACAATAGCCCCTTCT  | 481               |
| Primer set 2                                                        | GGTCTCTTTTCCCCTCTGCT | TGAGCACAATAGCCCCTTCT  | 321               |
| Off-target site 4: chr11: +121235399: CAGTTTTGTACAGTGCCA TGG        |                      |                       |                   |
| Primer set 1                                                        | TGCTGAAGCTGCAGTGAGTT | GCATTTCCAAAATTGCACCT  | 378               |
| Primer set 2                                                        | GGCGCACACGCTTATATCTT | GCATTTCCAAAATTGCACCT  | 534               |
| Off-target site 5: chr15: +100726923: GATGATATGTCCCAGTGCCA TAG      |                      |                       |                   |
| Primer set 1                                                        | TACCATCCCCATTACCCTGA | ATGAGAACAATGCCCCTGAC  | 419               |
| Primer set 2                                                        | CTATGCTCCCTCCTCACTGC | ATGAGAACAATGCCCCTGAC  | 469               |
| sgRNA 2 target: GCATAAGACCGCACAGCTCC TGG                            |                      |                       |                   |
| Off-target site 1: chr2: chr10: -48464924: GAATGAGACCTCACAGCTCC TGG |                      |                       |                   |
| Primer set 1                                                        | AAGCCTCTTGGGAGGCTAAG | AACAGGTTCAAGGAGGAGGT  | 514               |
| Primer set 2                                                        | AAGCCTCTTGGGAGGCTAAG | GGGAAAGTAGGCGATGTTCA  | 355               |
| Off-target site 2: chr8: +111572: CCAGGAGCTGTCCAGTCT TAT            |                      |                       |                   |
| Primer set 1                                                        | GATCCTAGCCTGCACTGCTC | CTCCATGTCATCTCCCTGCT  | 324               |
| Primer set 2                                                        | GCTGCAGGCTTCAGTCTACC | GCTTCTTTGGGACTCTGCTG  | 479               |
| Off-target site 3: chr6: -170696611: ACATAAGACTGGACAGCTCC TGG       |                      |                       |                   |
| Primer set 1                                                        | GCTTCTTTGGGACTCTGCTG | TAGAAGCTGCTGTGCCTGAA  | 344               |
| Primer set 2                                                        | GCTTCTTTGGGACTCTGCTG | GCTGCAGGCTTCAGTCTACC  | 479               |
| Off-target site 4: chr1: +243006185: ACATAAGACTGGACAGCTCC TGG       |                      |                       |                   |
| Primer set 1                                                        | GCTTCTTTGGGACTCTGCTG | GCTGCAGGCTTCAGTCTACC  | 462               |
| Primer set 2                                                        | CTCCATGTCATCTCCCTGCT | GATCCTAGCCTGCACTGCTC  | 307               |
| Off-target site 5: chr1: +223903393: ACATAAGACTGGACAGCTCC TGG       |                      |                       |                   |
| Primer set 1                                                        | GTTCTGAGGGACAGAGACG  | GGAGGTGACCAATCTTGAA   | 392               |
| Primer set 2                                                        | GCTTCTTTGGGACTCTGCTG | GCTGCAGGCTTCAGTCTACC  | 479               |

\*: "+" and "-" indicate forward strand and reverse strand
