# Supplementary material for: Metabolic Maturation Exaggerates Abnormal Calcium Handling in a Lamp2 Knockout Human Pluripotent Stem Cell-Derived Cardiomyocyte Model of Danon Disease
Source: MDPI journal article supplement (doi:10.3390/biom13010069), 2022-12-29
Supplement: s1 [file s1]

**Supplemental Table S1. Summary of the sequences of qPCR oligos used in the current study.**

| Gene name                         | Primer sequences        |                         | Function                                        |
|-----------------------------------|-------------------------|-------------------------|-------------------------------------------------|
|                                   | Forward                 | Reverse                 |                                                 |
| Target protein                    |                         |                         |                                                 |
| LAMP2                             | GGGTTTCAGCCTTTCAATGTGAC | GCACAGCATGTCCTGGCT      | lysosomal associated membrane protein 2         |
| Calcium handling                  |                         |                         |                                                 |
| ATP2A2                            | ATGGGGCTCCAACGAGTTAC    | ACACCCACAATTGCATTGGC    | SERCA sarco/endoplasmic reticulum Ca2+-ATPase   |
| CASQ2                             | AGGAACACCAAAGACCCACTC   | GATGCTCAGATCGGGGTTGT    | calsequestrin2                                  |
| RYR2                              | CGTGTGGGTCGGAGACATTA    | AGAGATTGACAGCCCGATGC    | ryanodine receptor 2                            |
| PLN                               | CCAGTCAAACACCCGTAAGACT  | GAGCGAGTGAGGTATTGGACT   | phospholamban                                   |
| CACNA1C                           | AGATGACTGCTTATGGGGCTT   | CACTGAACCACATGCTTTAGCC  | calcium voltage-gated channel subunit alpha 1 C |
| SCN5A                             | CAGCAGTGGAAAGCGGAAC     | AGTCCTCTGGGTCCTTGACA    | sodium voltage-gated channel alpha subunit 5    |
| Sarcomere                         |                         |                         |                                                 |
| MYH6                              | TGGACAAGCTGCAACTGAAGG   | AGTGTCACTCCTCATCGTGCAT  | myosin heavy chain 6                            |
| MYH7                              | GCTCTGTGTCTTTCCCTGCT    | TGAGGTCAAAGGCCTGGTC     | myosin heavy chain 7                            |
| TNNI1                             | CTCCCGCAAACCTTGCTGA     | GGTGTGTGGAGGCATTTGG     | troponin I1                                     |
| TNNI3                             | CAAAGCAAGAGCTGGAGCGA    | TCAGATCTGCAATCTCCGTGA   | troponin I3                                     |
| MYBPC3                            | CATGAGGCGCGATGAGAAGA    | ATGTACTTGCTGCCGCTCAT    | myosin binding protein 3C                       |
| ACTC1                             | GCCGACGAACCCCT          | CGTAGGAGTCCTTCTGACCC    | actin alpha cardiac muscle 1                    |
| Autophagy and protein homeostasis |                         |                         |                                                 |
| BAG3                              | CCCCGTTCAGGTCATCTGTC    | TTTCTCGATGGGTCATGGGC    | BAG cochaperone 3                               |
| HSPA8                             | TATTGGAGCCAGGCCTACAC    | TCTCGACTTTTCCGTGCTGG    | heat shock protein (Hsp70) family A member 8    |
| HSPB8                             | CAGCAAGAAGGTGGCATTGTT   | GGGGAAGCTCGTTGTTGAAA    | heat shock protein family B (small) member 8    |
| HSP90B1                           | TCTAGGACGGGGAACGACAA    | TGGGCTCCTCAACAGTTTCAG   | heat shock protein 90 beta family member 1      |
| Metabolism                        |                         |                         |                                                 |
| GAPDH                             | GGAGCGAGATCCCTCCAAAAT   | GGCTGTTGTCATACTTCTCATGG | glyceraldehyde-3-phosphate dehydrogenase        |
| PPARGC1A                          | CAAGCAAAGGGAGAGGCAGA    | TTCGTTTGACCTGCGCAAAG    | PPARG coactivator 1 alpha                       |
| COX8A                             | TGTGGTGTACTCCGTGCCAT    | GGTCACGAAGCAGGAGGTAA    | cytochrome c oxidase subunit 6A1                |
| COX6A1                            | CATCTCCGCATCAGGACCAA    | ATGTGCAGAGTAACGGTCCA    | cytochrome c oxidase subunit 8A                 |
| Stress marker                     |                         |                         |                                                 |
| NPPA                              | TGATCGATCTGCCCTCCTAA    | TCCTCCCTGGCTGTTATCTTC   | natriuretic peptide A                           |
| Housekeeping gene                 |                         |                         |                                                 |
| 18S rRNA                          | CTCAACACGGGAAACCTCAC    | CGCTCCACCAACTAAGAACG    | 18s ribosomal RNA                               |
