# Supplementary material for: Metabolic Maturation Exaggerates Abnormal Calcium Handling in a Lamp2 Knockout Human Pluripotent Stem Cell-Derived Cardiomyocyte Model of Danon Disease
Source: MDPI journal article supplement (doi:10.3390/biom13010069), 2022-12-29
Supplement: s1 [file s1]

**Supplemental Table S2. Summary of antibodies used in the current study.**

| Name                                                 | Dilution |         | Company           | Cat. No.  |
|------------------------------------------------------|----------|---------|-------------------|-----------|
|                                                      | ICC / IF | WB      |                   |           |
| Primary Antibody                                     |          |         |                   |           |
| Anti- $\alpha$ -Actinin (Sarcomere) Mouse monoclonal | 1:800    | 1:2500  | Sigma Aldrich     | A-7811    |
| Anti-Cardiac Troponin T Rabbit IgG                   | 1:1000   | 1:1000  | Abcam             | Ab-45932  |
| Anti-LAMP-2 (H4B4) Mouse monoclonal IgG              |          | 1:500   | Santa Cruz        | sc-18822  |
| Anti-GAPDH (D411) Mouse monoclonal IgG               |          | 1:1000  | Santa Cruz        | sc-47724  |
| Anti-LC3A/B Rabbit                                   |          | 1:1000  | Cell Signaling    | 4108S     |
| Anti-CAMKII Delta Isoforms (2/4/9/11/11a) Rabbit pAb |          | 1:5000  | Badrilla          | A010-56AP |
| Anti-CAMKII (pThr286 or 287) Rabbit pAb              |          | 1:1000  | Badrilla          | A010-50AP |
| Anti-OCT4A (C30A3) Rabbit mAb                        | 1:400    |         | Cell Signaling    | 2840S     |
| Anti-SOX2 (L1D6A2) Mouse mAb                         | 1:400    |         | Cell Signaling    | 4900S     |
| Anti-NANOG (D73G4) XP Rabbit mAb                     | 1:200    |         | Cell Signaling    | 4903S     |
| Anti-SSEA-4 (MC813) Mouse mAb                        | 1:500    |         | Cell Signaling    | 4755S     |
| Anti-beta3-Tubulin (D7169) XP Rabbit mAb             | 1:300    |         | Cell Signaling    | 5568S     |
| Anti-Brachury (D2Z3J) Rabbit mAb                     | 1:600    |         | Cell Signaling    | 81694S    |
| Anti-SOX17 (D1T8M) Rabbit mAb                        | 1:3200   |         | Cell Signaling    | 81778S    |
| Secondary Antibody                                   |          |         |                   |           |
| AlexaFluor488 Goat anti-Rabbit IgG(H+L)              | 1:1000   |         | Thermo Scientific | A11008    |
| AlexaFluor594 Goat anti-Rabbit IgG(H+L)              | 1:1000   |         | Thermo Scientific | A110012   |
| AlexaFluor488 Goat anti-Mouse IgG(H+L)               | 1:1000   |         | Thermo Scientific | A11001    |
| AlexaFluor594 Goat anti-Mouse IgG(H+L)               | 1:1000   |         | Thermo Scientific | A11005    |
| AlexaFluor647 Goat anti-Mouse IgG (H+L)              | 1:1000   |         | Thermo Scientific | A21235    |
| Anti-rabbit IgG HRP-linked Antibody                  |          | 1:2500  | Cell Signaling    | 7074S     |
| Anti-mouse IgG HRP-linked Antibody                   |          | 1:10000 | Cell Signaling    | 7076S     |
