# Supplementary material for: Metabolic Maturation Exaggerates Abnormal Calcium Handling in a Lamp2 Knockout Human Pluripotent Stem Cell-Derived Cardiomyocyte Model of Danon Disease
Source: Biomolecules. 2022 Dec 29;13(1):69. doi: 10.3390/biom13010069 (PMC9855424; doi:10.3390/biom13010069)
Supplement: Supplementary file 1 [file biomolecules-13-00069-s001.zip]

Archive with 4 entries (4 files):
- biomolecules-2128418-supplementary figures.pdf
- Supplemental Table S1.pdf
- Supplemental Table S2.pdf
- Supplemental Table S3.pdf
